# Supplementary material
Source: PubMed Central journal article supplement (PMC4076078)
Supplement: supp_M049429_jlr.M049429-1.pdf [file supp_M049429_jlr.M049429-1.pdf]

## **Supplemental Figure Legends**

### **Supplemental Figure I. Serum lipid levels of animals on normal diet (ND) or a high cholesterol (HC) diet.**

(A) Mice were fed HC diet (n=10) or ND (n=7) for 4 weeks. Animals were sacrificed after 4-h fasting. Total cholesterol (TC) and LDL-c were measured using commercial kits.

(B) Male golden Syrian hamsters were fed HC diet (n=6) or ND (n=6) for 2-weeks. Hamsters were fasted overnight before sacrifices for serum sample collections. Serum TC and triglycerides (TG) were measured using commercial kits. \*\*\* $p < 0.001$  compared to ND group.

### **Supplemental Figure II. High cholesterol diet has no effects on HuR mRNA and protein levels in hamster liver.**

(A) Male golden Syrian hamsters were fed HC diet (n=6) or ND (n=6) for 2-weeks before sacrifices. Liver HuR mRNA levels in HC group or ND group were assessed by qRT-PCR.

(B) HuR protein levels in individual hamster liver protein extracts were examined by Western blotting.

**Supplemental Figure III. Ad-shHNRNPD injection had no effects on body weight, food intake or serum PCSK9 levels of C57BL/6 mice fed HC diet.** C57BL/6 mice were fed HC diet (n=10) for two weeks. Ad-shHNRNPD or control (Ad-shGFP) was injected into 5 mice of each diet. Animals were sacrificed after 7 days of infection. Body weight (A) and food intake (B) were measured during the treatment. In C, after 7-days of infection, serum PCSK9 levels in mice infected with Ad-shHNRNPD or control adenovirus (Ad-shGFP) were quantified by a mouse PCSK9 ELISA kit.

**Supplemental Figure IV. High cholesterol diet increases HNRNPD mRNA and protein levels and reduces mRNA levels of HNRNPD binding targets in liver of C57BL/6 mice.**

Individual liver tissues of C57BL/6J Mice fed high cholesterol diet (HCD, n=5) or normal diet (ND, n=5) and infected with control virus (Ad-shGFP) were analyzed for HNRNP D and HuR protein expressions by Western blotting (A) and mRNA expressions by qRT-PCR (B). In C, mRNA levels of five known HNRNP D target transcripts were measured by qRT-PCR. \*  $p < 0.05$  and \*\*\*  $p < 0.001$  compared to ND group.

**Supplemental Figure V. Western blot analysis of LDLR, HNRNP D isoforms in liver samples of Ad-GFP infected control mice fed ND or HCD and Ad-shHNRNP D-infected mice fed ND or HCD.** Individual liver tissues of C57BL/6J Mice infected with Ad-shGFP fed ND (n=4), HCD (n=4) and Mice infected with Ad-shHNRNP D fed ND (n=4) or HCD (n=4) were analyzed for LDLR and HNRNP D protein expressions by Western blotting. Membranes were reprobated with anti- $\beta$ -actin antibody. The protein abundance of LDLR and HNRNP D p37/p45 were quantified using the Alpha View Software with normalization by signals of  $\beta$ -actin. Values are mean  $\pm$  SEM of 4 samples per group. \*\*  $p < 0.01$ , and \*\*\*  $p < 0.001$  compared to the ND fed Ad-shGFP group.

**Supplemental Figure VI.** AML12 cells cultured overnight in 10% LPDS medium were treated with RSV, 24-OHC, 24,25-EC or CHO at indicated concentrations for 24 h. Gene expression analysis was conducted. Duplicate wells were used for each treatment condition.

# Supplemental Figure I

## A: Mouse serum

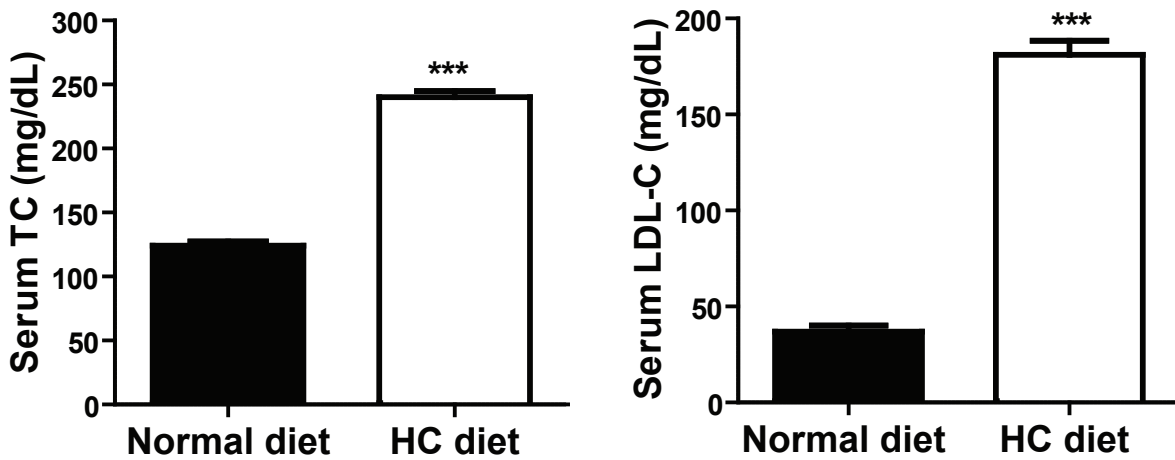

## B: Hamster serum

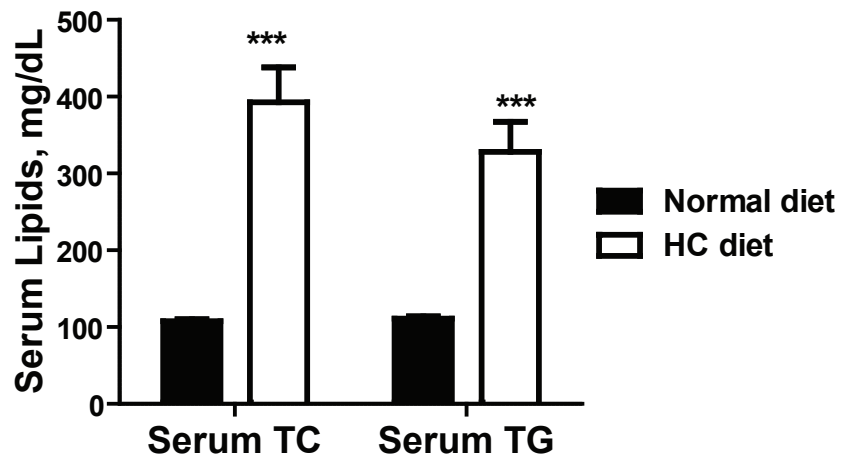

# Supplemental Figure II

**A**

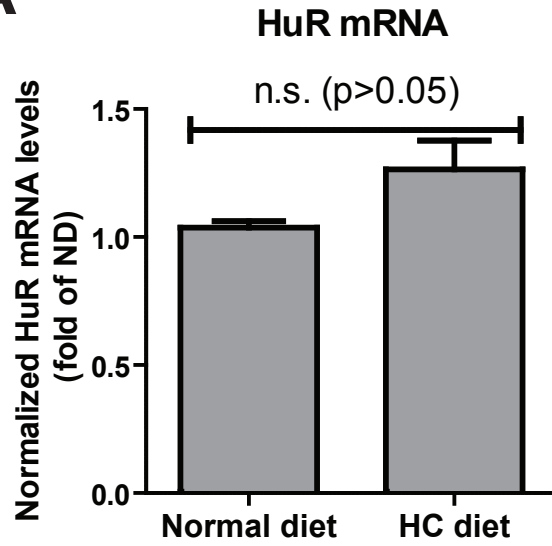

**B**

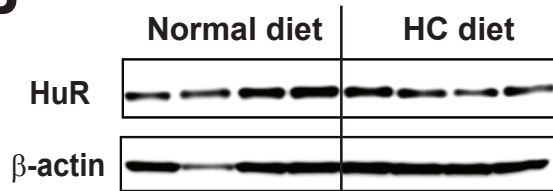

# Supplemental Figure III

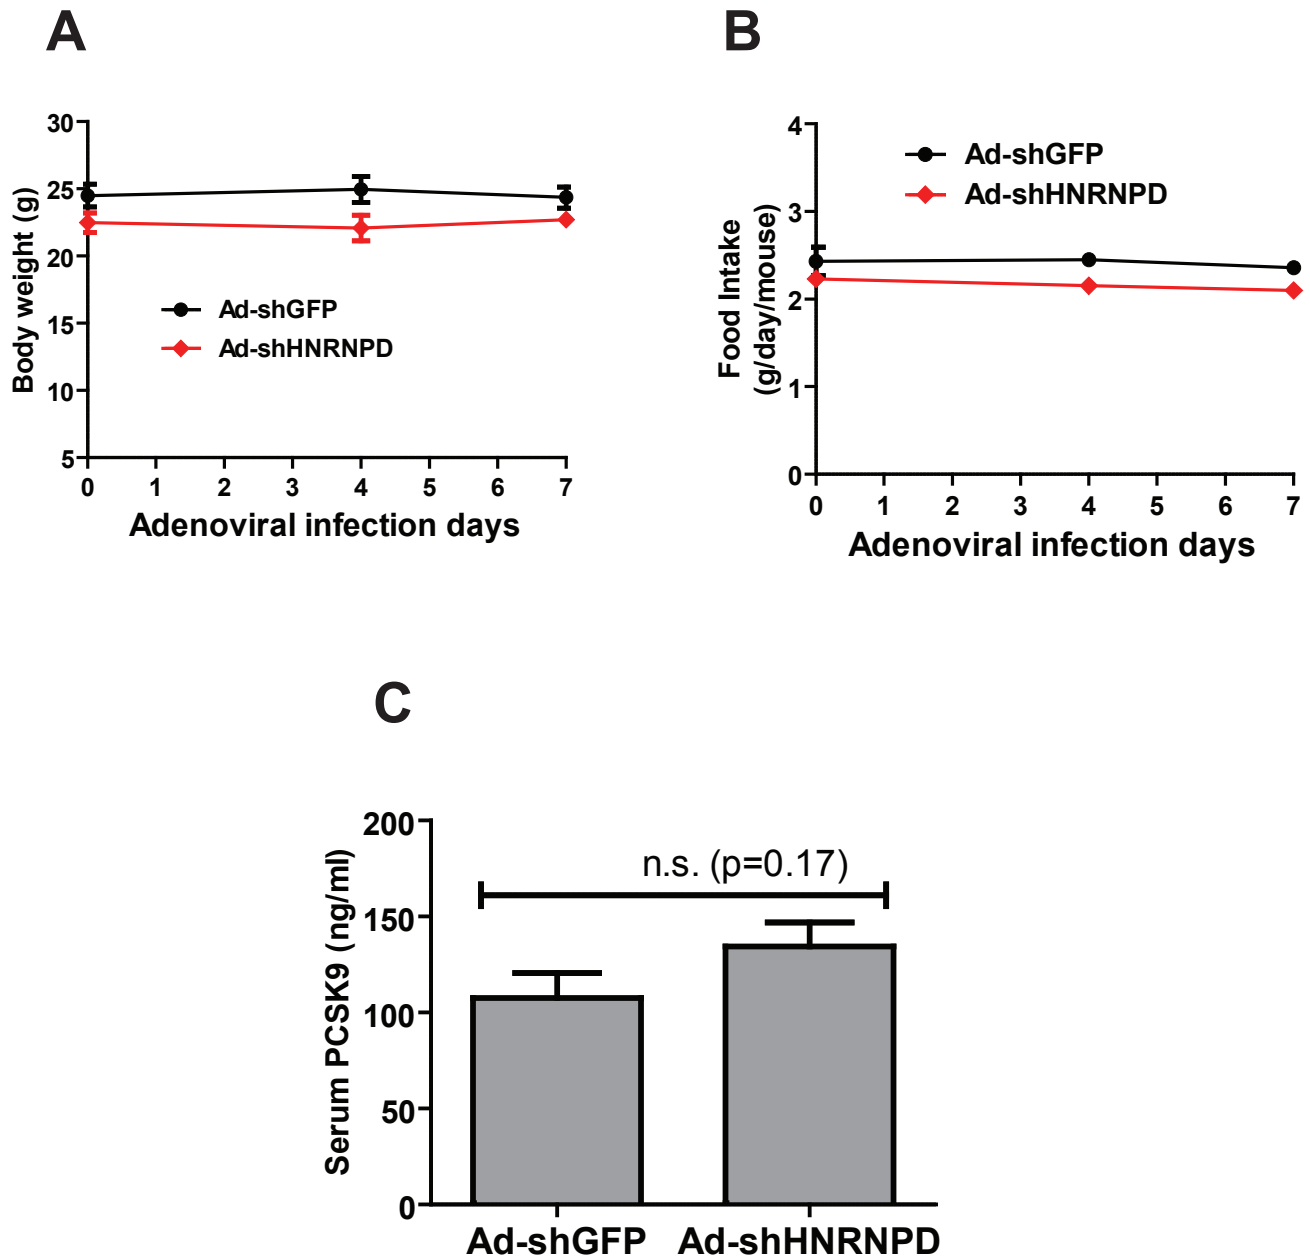

# Supplemental Figure IV

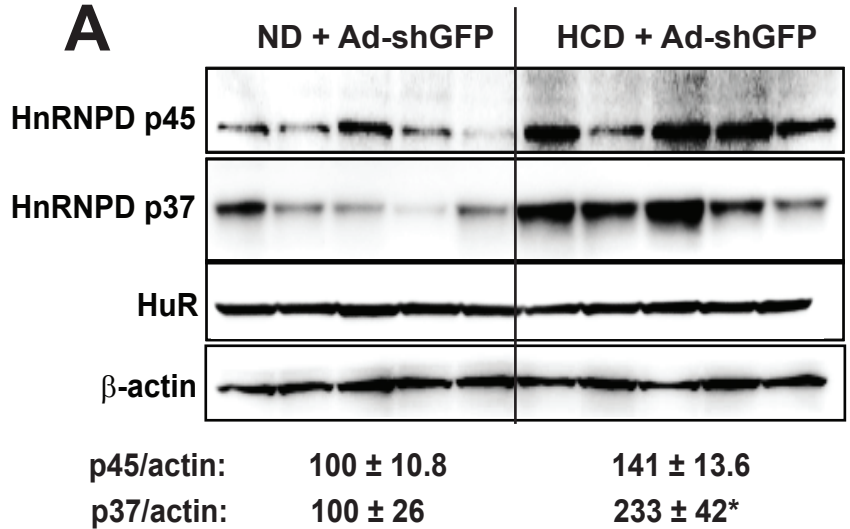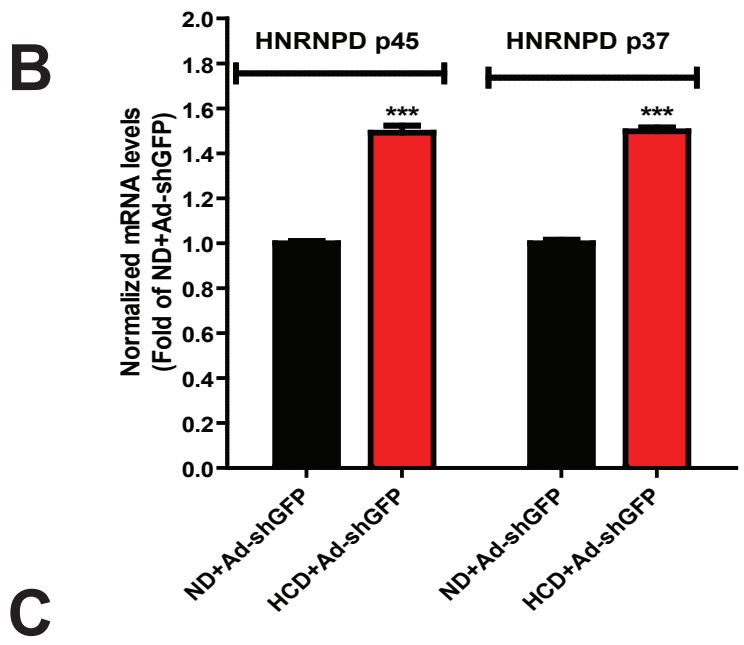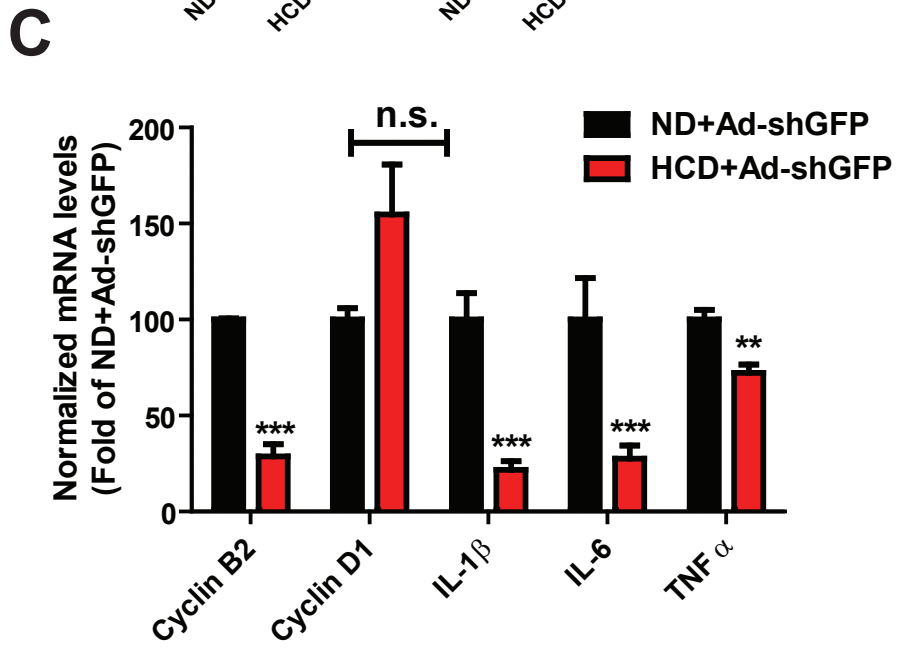

# Supplemental Figure V

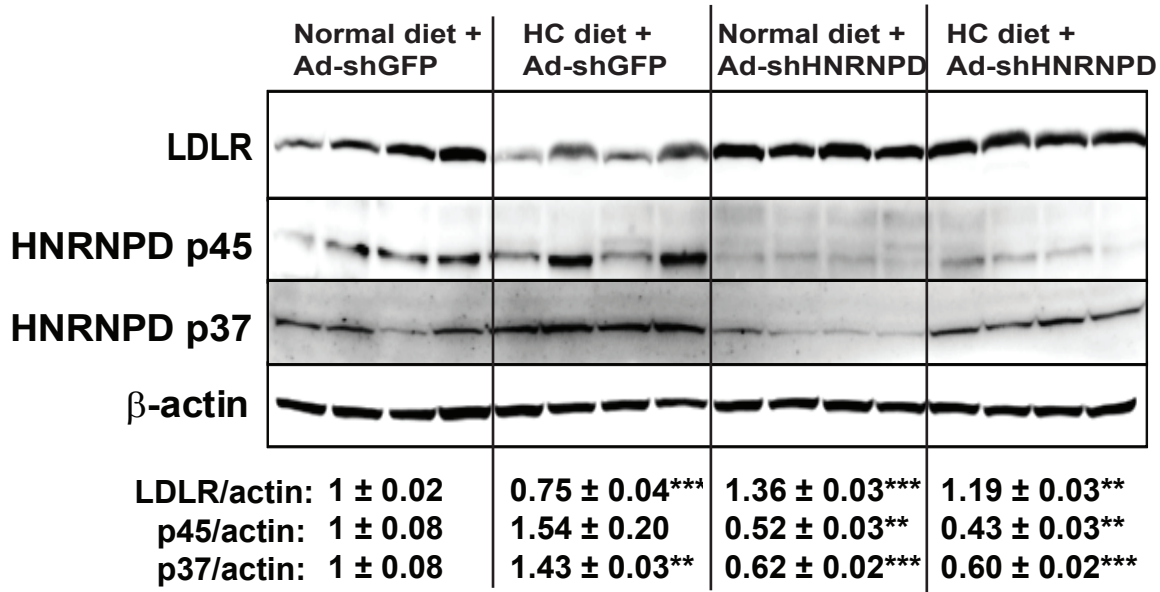

# Supplemental Figure VI

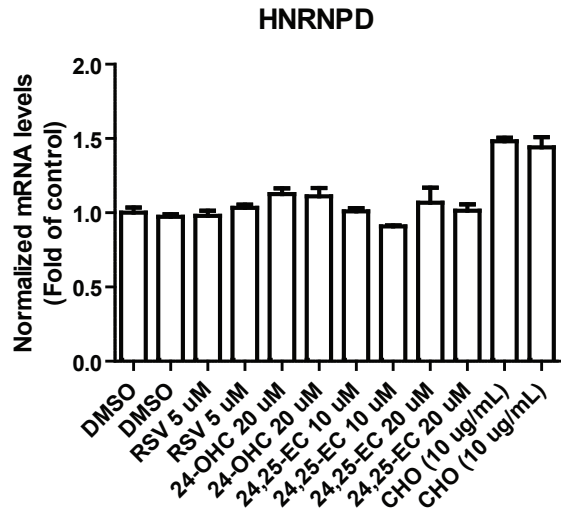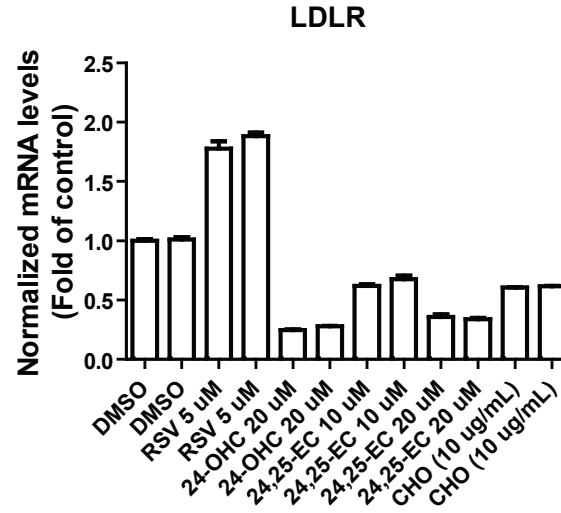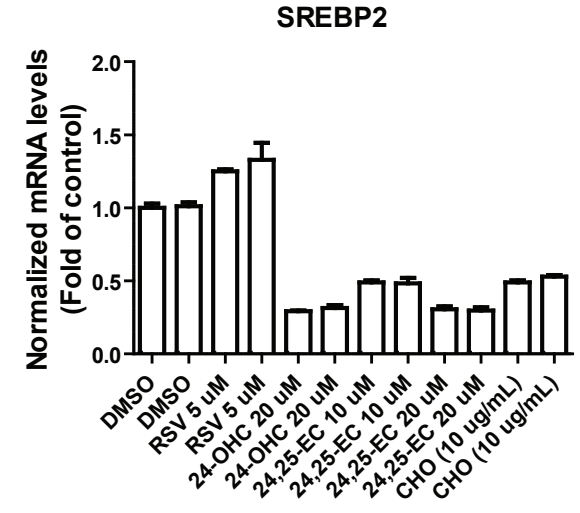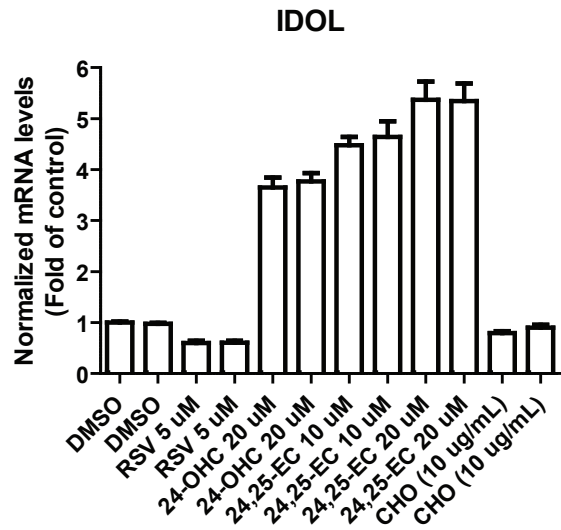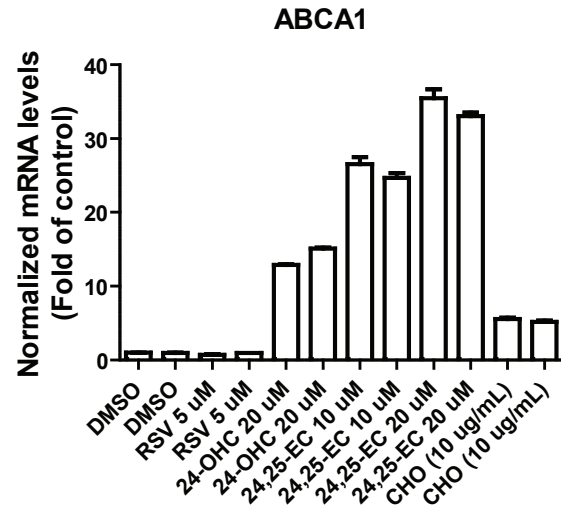



**Supplemental Table I: Mouse and hamster quantitative real-time PCR primer sequences**

| <b>Gene name</b>                    | <b>Forward</b>                | <b>Reverse</b>                |
|-------------------------------------|-------------------------------|-------------------------------|
| <b>Mouse LDLR</b>                   | CGCGGATCTGATGCGTCGCT          | CGGCCCTGGCAGTTCTGTGG          |
| <b>Mouse PCSK9</b>                  | TTGCAGCAGCTGGGAACTT           | CCGACTGTGATGACCTCTGGA         |
| <b>Mouse HMGCR</b>                  | CTTTCAGAAACGAACTGTAGCTC<br>AC | CTAGTGGAAGATGAATGGACATG<br>AT |
| <b>Mouse SREBP2</b>                 | CCAAAGAAGGAGAGAGGGCGG         | CGCCAGACTTGTGCATCTTG          |
| <b>Luciferase</b>                   | CGCACATATCGAGGTGGACA          | GCAAGCTATTCTCGCTGCAC          |
| <b>Mouse HNRNPI</b>                 | AGCCAATGGAAACGATAGCAA         | GCGCCACCGATGTATAGTAGT         |
| <b>Mouse KSRP</b>                   | ACTGGAGCACCTGAGTCTGT          | CGTTGTCTGTAAGACTGTCCT         |
| <b>Mouse HNRNPD p37</b>             | AGTCGGAGAGTGTAGATAAGGTC       | GGCCCTTTTAGGATCAATGACTT       |
| <b>Mouse HNRNPD p45</b>             | CAAACCTCCTCCCCACGACAC         | CTTTCTTTGTGGTGTCCCAGC         |
| <b>Mouse GAPDH</b>                  | AACTTTGGCATTGTGGAAGG          | GGATGCAGGGATGATGTTCT          |
| <b>Mouse HuR</b>                    | GTTTGGGCGAATCATCAACT          | CTGGGGGTTTATGACCATTG          |
| <b>Hamster GAPDH</b>                | AACTTTGGCATTGTGGAAGG          | GGATGCAGGGATGATGTTCT          |
| <b>Hamster LDLR</b>                 | TTGGGTTGATTCCAAACTCC          | GATTGGCACTGAAAATGGCT          |
| <b>Hamster HNRNPD p37</b>           | AGTCGGAGAGTGTAGATAAGGTC       | GGCCCTTTTAGGATCAATGACTT       |
| <b>Hamster HuR</b>                  | TTCTGGTGTCAATGTCCCCG          | CAAAGGGGCCAAACATCTGC          |
| <b>Mouse IL-1<math>\beta</math></b> | TGCCACCTTTTGACAGTGATG         | TGATGTGCTGCTGCGAGATT          |
| <b>Mouse IL-6</b>                   | CACTTCACAAGTCGGAGGCT          | CTGCAAGTGCATCATCGTTGT         |
| <b>Mouse TNF<math>\alpha</math></b> | ACTGAACTTCGGGGTGATCG          | CTTGGTGGTTTGCTACGACG          |
| <b>Mouse Cyclin B2</b>              | GACCCTCCCAACGGTGTC            | CTAAAACTGCCCGCCGGATA          |
| <b>Mouse Idol</b>                   | AGGAGATCAACTCCACCTTCTG        | ATCTGCAGACCGGACAGG            |
| <b>Mouse Cyclin D1</b>              | TCATCAAGTGTGACCCGGACT         | ATGTCCACATCTCGCACGTC          |
| <b>Mouse ABCA1</b>                  | AACAGTTTGTGGCCCTTTTG          | AGTCCAGGCTGGCGTACTT           |
